# Supplementary material for: Cyclen-based bismacrocycles for biological anion recognition. A potentiometric and NMR study of AMP, ADP and ATP nucleotide complexation
Source: Royal Society of Chemistry journal article supplement (doi:10.1039/b719514a), 2008-01-01
Supplement: b719514a.pdf [file b719514a.pdf]

## Electronic Supplementary Information

### **Cyclen-based bismacrocycles for biological anion recognition. A potentiometric and NMR study of AMP, ADP and ATP nucleotide complexation.**

*UMR CNRS 6521, “Chimie, Electrochimie Moléculaire et Analytique”, Université de Bretagne Occidentale, C. S. 93837, 6 avenue Victor Le Gorgeu, 29238 Brest Cedex 3, France. Fax: 33 2 98016138; Tel: 33 2 98017001; E-Mail: Henri.Handel@univ-brest.fr.*

**Figure 1:** Species distribution diagrams for the **BMC** and **BPyC** ligands as a function of p[H] ( $H_2O$  ;  $I = 0.1$  M (NaCl) ;  $T = 25.0 \pm 0.2^\circ C$  ;  $[L]_{tot} = 10^{-3}$  M)

**Figure 2:** Species distribution diagrams for substrates ( $H_2O$ ;  $I = 0.1$  M (NaCl) ;  $T = 25.0 \pm 0.2^\circ C$  ;  $[Anion]_{tot} = 10^{-3}$  M)

**Table 1:** Logarithm recognition constants,  $\log K_{alh}$ , for the two bismacrocycles with AMP, ADP and ATP ( $I = 0.1$  M (NaCl);  $T = 25^\circ C$ ).

**Table 2:** Logarithm recognition constants,  $\log K_{alh}$ , for the two bismacrocycles with inorganic phosphates: orthophosphate, pyrophosphate, triphosphate ( $I = 0.1$  M (NaCl);  $T = 25^\circ C$ ).

**Figure 3:** Species distribution diagrams for **AMP** with (a) **BMC** and (b) **BPyC** as a function of p[H]

**Figure 4:** Species distribution diagrams for **ADP** with (a) **BMC** and (b) **BPyC** as a function of p[H]

**Figure 5:** Species distribution diagrams for **ATP** with (a) **BMC** and (b) **BPyC** as a function of p[H]

**Figure 6:** Experimental  $^1H$  chemical shifts for the proton of the **BMC**: ligand free and in presence of triphosphate.

**Figure 7:** Experimental  $^1H$  chemical shifts for the proton of the **BPyC**: ligand free and in presence of triphosphate.

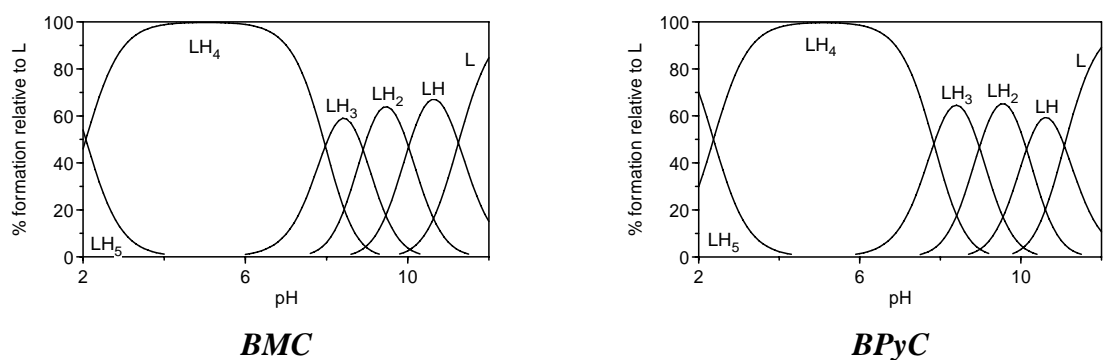

**Figure 1:** Species distribution diagrams for the **BMC** and **BPyC** ligands as a function of p[H] ( $H_2O$  ;  $I = 0.1 M (NaCl)$  ;  $T = 25.0 \pm 0.2^\circ C$  ;  $[L]_{tot} = 10^{-3} M$ )

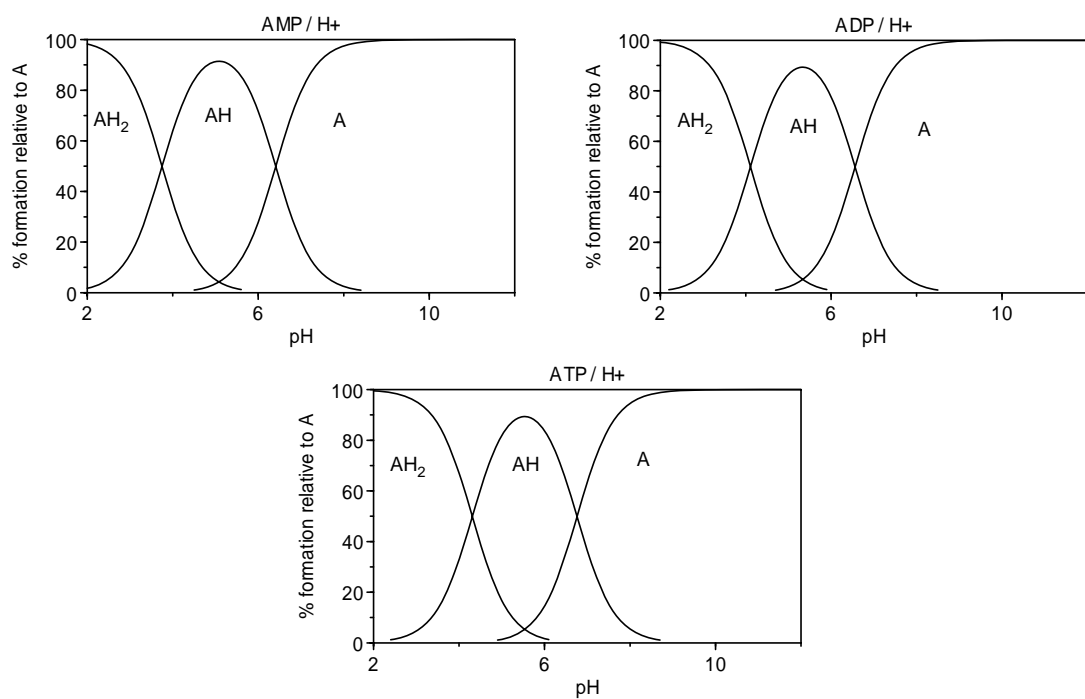

**Figure 2:** Species distribution diagrams for substrates  $H_2O$  ;  $I = 0.1 M (NaCl)$  ;  $T = 25.0 \pm 0.2^\circ C$  ;  $[Anion]_{tot} = 10^{-3} M$

**Table 1:** Logarithm recognition constants,  $\log K_{alh}$ , for the two bismacrocycles with AMP, ADP and ATP ( $I = 0.1 \text{ M (NaCl)}$ ;  $T = 25^\circ\text{C}$ ).

| <b>BMC</b>                                                                                                            | <b>AMP</b>          | <b>ADP</b>           | <b>ATP</b>           |
|-----------------------------------------------------------------------------------------------------------------------|---------------------|----------------------|----------------------|
| A+L =AL                                                                                                               |                     |                      |                      |
| A+L+H = ALH<br>A+LH = ALH                                                                                             |                     |                      |                      |
| A+L+2H=ALH <sub>2</sub><br>A+LH <sub>2</sub> =ALH <sub>2</sub>                                                        | 24.45<br>3.18       | 23.71<br>2.44        |                      |
| A+L+3H=ALH <sub>3</sub><br>A+LH <sub>3</sub> =ALH <sub>3</sub>                                                        | 33.62(9.17)<br>3.45 | 32.76(9.05)<br>2.59  | 33.13<br>2.98        |
| A+L+4H=ALH <sub>4</sub><br>A+LH <sub>4</sub> =ALH <sub>4</sub>                                                        | 42.05(8.43)<br>3.91 | 41.44(8.68)<br>3.30  | 41.87(8.74)<br>3.73  |
| A+L+5H=ALH <sub>5</sub><br>A+LH <sub>5</sub> =ALH <sub>5</sub><br>AH+LH <sub>4</sub> =ALH <sub>5</sub>                | 48.20(6.15)<br>3.65 | 47.46(6.02)<br>2.91  | 47.83(5.96)<br>2.93  |
| A+L+6H=ALH <sub>6</sub><br>AH+LH <sub>5</sub> =ALH <sub>6</sub><br>AH <sub>2</sub> +LH <sub>4</sub> =ALH <sub>6</sub> | 52.41(4.21)<br>4.11 | 52.12(4.66)<br>3.31  | 52.47(4.64)<br>3.26  |
| A+L+7H=ALH <sub>7</sub><br>AH <sub>2</sub> +LH <sub>5</sub> =ALH <sub>7</sub>                                         | 55.51(3.10)<br>5.14 | 54.53(2.41)<br>3.65  | 55.38(2.91)<br>4.10  |
| <b>BPyC</b>                                                                                                           |                     |                      |                      |
| A+L =AL                                                                                                               |                     |                      |                      |
| A+L+H = ALH<br>A+LH = ALH                                                                                             |                     | 14.01<br>2.93        |                      |
| A+L+2H=ALH <sub>2</sub><br>A+LH <sub>2</sub> =ALH <sub>2</sub>                                                        | 24.65<br>3.43       | 24.63(10.62)<br>3.41 | 24.56<br>3.34        |
| A+L+3H=ALH <sub>3</sub><br>A+LH <sub>3</sub> =ALH <sub>3</sub>                                                        | 34.01(9.36)<br>3.82 | 34.25(9.62)<br>4.06  | 34.83(10.27)<br>4.64 |
| A+L+4H=ALH <sub>4</sub><br>A+LH <sub>4</sub> =ALH <sub>4</sub>                                                        | 42.20(8.19)<br>4.17 | 42.92(8.67)<br>4.89  | 43.67(8.84)<br>5.64  |
| A+L+5H=ALH <sub>5</sub><br>A+LH <sub>5</sub> =ALH <sub>5</sub><br>AH+LH <sub>4</sub> =ALH <sub>5</sub>                | 48.38(6.18)<br>3.94 | 49.60(6.68)<br>5.01  | 51.58(7.91)<br>6.79  |
| A+L+6H=ALH <sub>6</sub><br>AH+LH <sub>5</sub> =ALH <sub>6</sub><br>AH <sub>2</sub> +LH <sub>4</sub> =ALH <sub>6</sub> | 52.29(3.91)<br>4.10 | 54.02(4.42)<br>5.32  | 57.73(6.15)<br>8.63  |
| A+L+7H=ALH <sub>7</sub><br>AH <sub>2</sub> +LH <sub>5</sub> =ALH <sub>7</sub>                                         | 54.80(2.51)<br>4.31 | 56.76(2.74)<br>5.76  | 61.66(3.93)<br>10.26 |

**Table 2:** Logarithm recognition constants,  $\log K_{alh}$ , for the two bismacrocycles with inorganic phosphates: orthophosphate, pyrophosphate, triphosphate ( $I = 0.1 \text{ M (NaCl)}$ ;  $T = 25^\circ\text{C}$ ).

| <b>BMC</b>                                         | Ref 11             |                             |                                |
|----------------------------------------------------|--------------------|-----------------------------|--------------------------------|
|                                                    | $\text{PO}_4^{3-}$ | $\text{P}_2\text{O}_7^{4-}$ | $\text{P}_3\text{O}_{10}^{5-}$ |
| A+LH = ALH                                         |                    | 2.88                        | 4.87                           |
| A+LH <sub>2</sub> =ALH <sub>2</sub>                |                    | 3.12                        | 4.10                           |
| AH+LH=ALH <sub>2</sub>                             | 3.19               |                             |                                |
| A+LH <sub>3</sub> =ALH <sub>3</sub>                |                    | 2.88                        | 4.03                           |
| AH+LH <sub>2</sub> =ALH <sub>3</sub>               | 2.92               |                             |                                |
| A+LH <sub>4</sub> =ALH <sub>4</sub>                |                    |                             |                                |
| AH+LH <sub>3</sub> =ALH <sub>4</sub>               | 2.89               | 3.52                        | 4.19                           |
| A+LH <sub>5</sub> =ALH <sub>5</sub>                |                    |                             |                                |
| AH+LH <sub>4</sub> =ALH <sub>5</sub>               | 2.90               | 3.23                        | 1.90                           |
| AH+LH <sub>5</sub> =ALH <sub>6</sub>               |                    |                             |                                |
| AH <sub>2</sub> +LH <sub>4</sub> =ALH <sub>6</sub> |                    | 3.11                        | 3.18                           |
| AH <sub>2</sub> +LH <sub>5</sub> =ALH <sub>7</sub> |                    | 4.24                        | 4.33                           |
| <b>BPyC</b>                                        |                    |                             |                                |
| A+LH = ALH                                         |                    | 4.65                        |                                |
| A+LH <sub>2</sub> =ALH <sub>2</sub>                |                    | 4.52                        | 3.71                           |
| AH+LH=ALH <sub>2</sub>                             | 4.02               |                             |                                |
| A+LH <sub>3</sub> =ALH <sub>3</sub>                |                    | 4.47                        | 4.22                           |
| AH+LH <sub>2</sub> =ALH <sub>3</sub>               | 3.83               |                             |                                |
| A+LH <sub>4</sub> =ALH <sub>4</sub>                |                    |                             |                                |
| AH+LH <sub>3</sub> =ALH <sub>4</sub>               | 3.80               | 4.45                        | 5.18                           |
| A+LH <sub>5</sub> =ALH <sub>5</sub>                |                    |                             |                                |
| AH+LH <sub>4</sub> =ALH <sub>5</sub>               | 3.88               | 3.60                        | 5.42                           |
| AH+LH <sub>5</sub> =ALH <sub>6</sub>               |                    |                             |                                |
| AH <sub>2</sub> +LH <sub>4</sub> =ALH <sub>6</sub> | 3.56               | 3.49                        | 6.69                           |
| AH <sub>2</sub> +LH <sub>5</sub> =ALH <sub>7</sub> |                    |                             | 10.10                          |
| AH <sub>3</sub> +LH <sub>5</sub> =ALH <sub>8</sub> |                    |                             | 10.71                          |

Ref 11: S. Develay, R. Tripier, M. Le Baccon, V. Patinec, G. Serratrice, H. Handel, *J. Chem. Soc. Dalton Trans.* 2005, 3016.

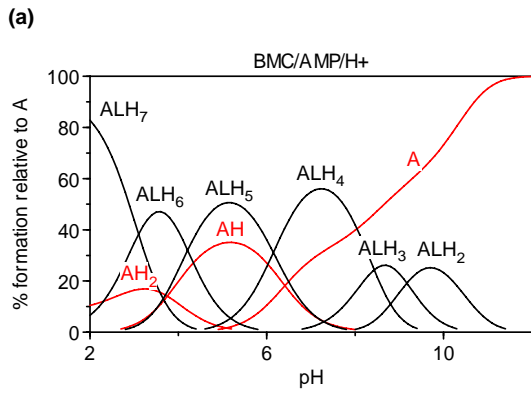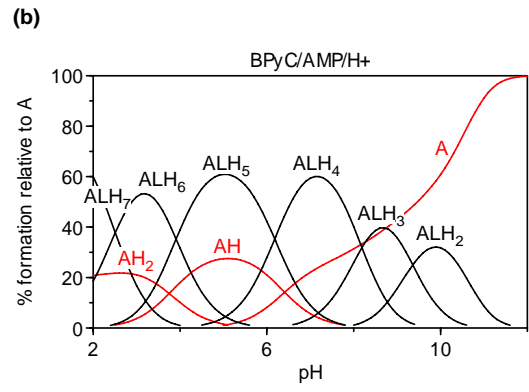

**Figure 3** Species distribution diagrams for *AMP* with (a) *BMC* and (b) *BPyC* as a function of  $p[H]$

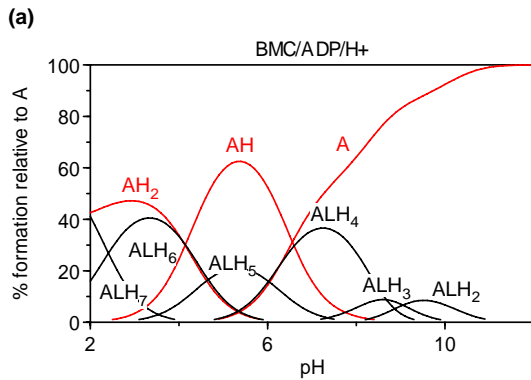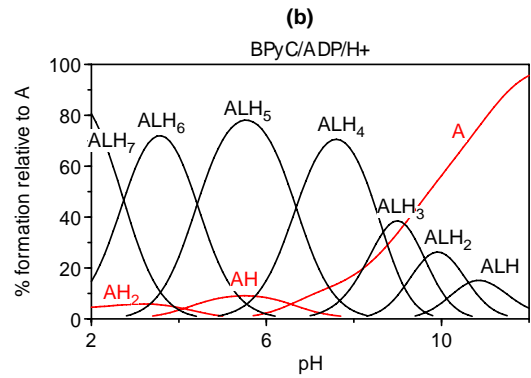

**Figure 4** Species distribution diagrams for *ADP* with (a) *BMC* and (b) *BPyC* as a function of  $p[H]$

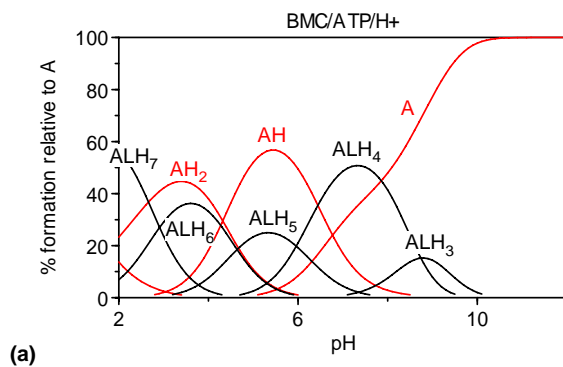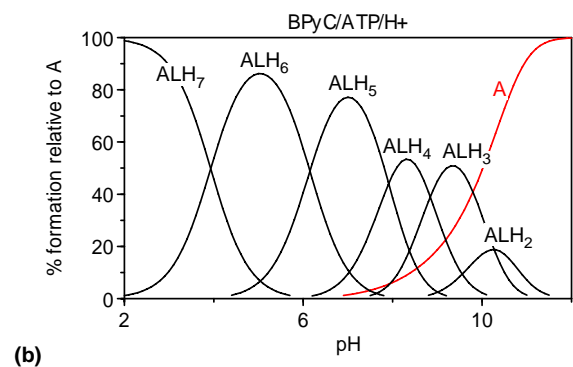

**Figure 5** Species distribution diagrams for *ATP* with (a) *BMC* and (b) *BPyC* as a function of  $p[H]$

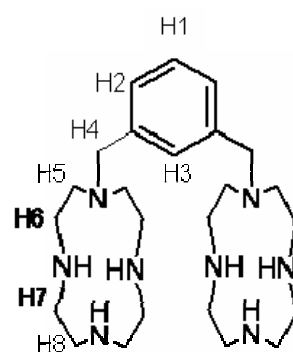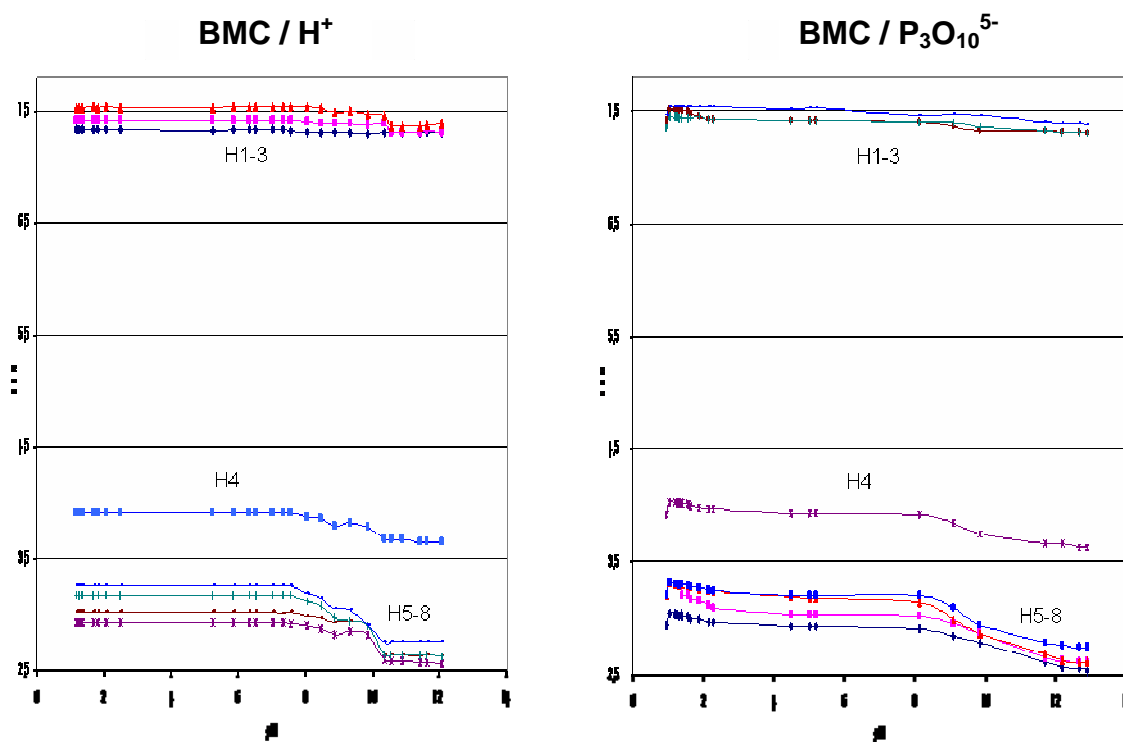

**Figure 6:** Experimental  $^1\text{H}$  chemical shifts for the proton of the *BMC*: ligand free and in presence of triphosphate.

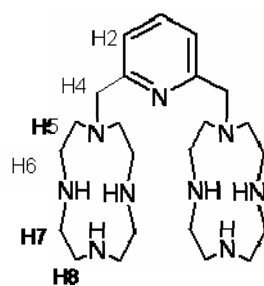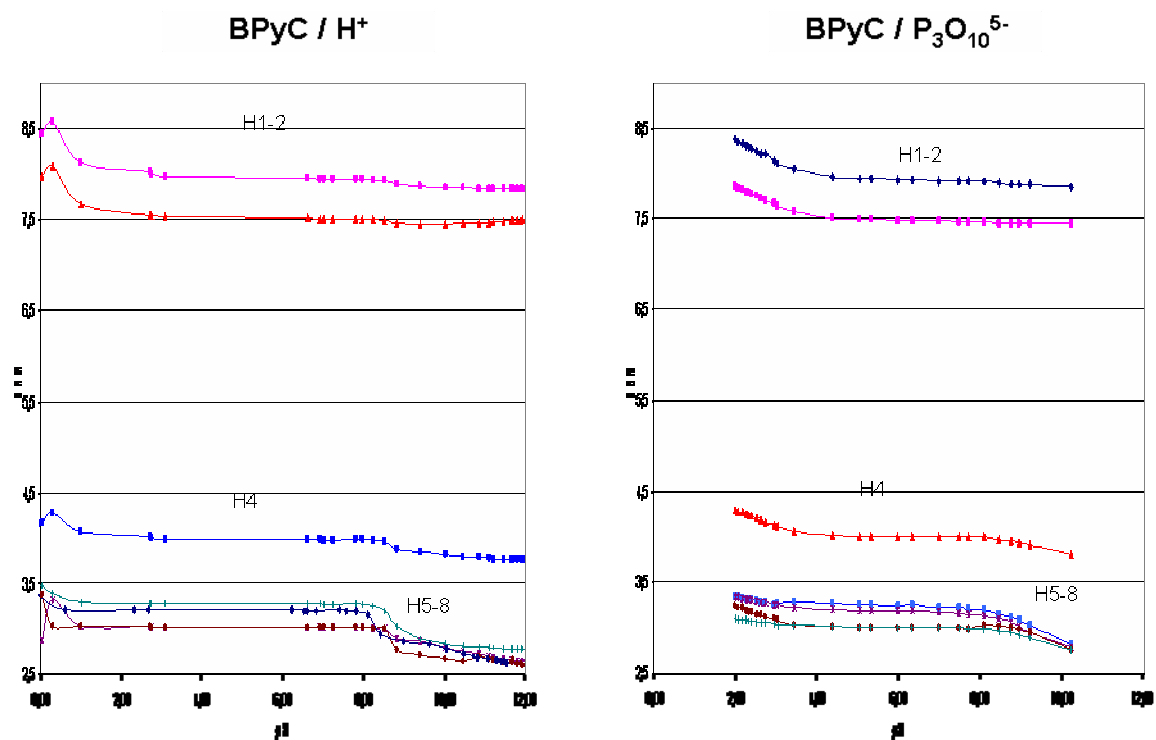

**Figure 7:** Experimental  $^1\text{H}$  chemical shifts for the proton of the *BPyc*: ligand free and in presence of triphosphate.
